# Psychiatric Services

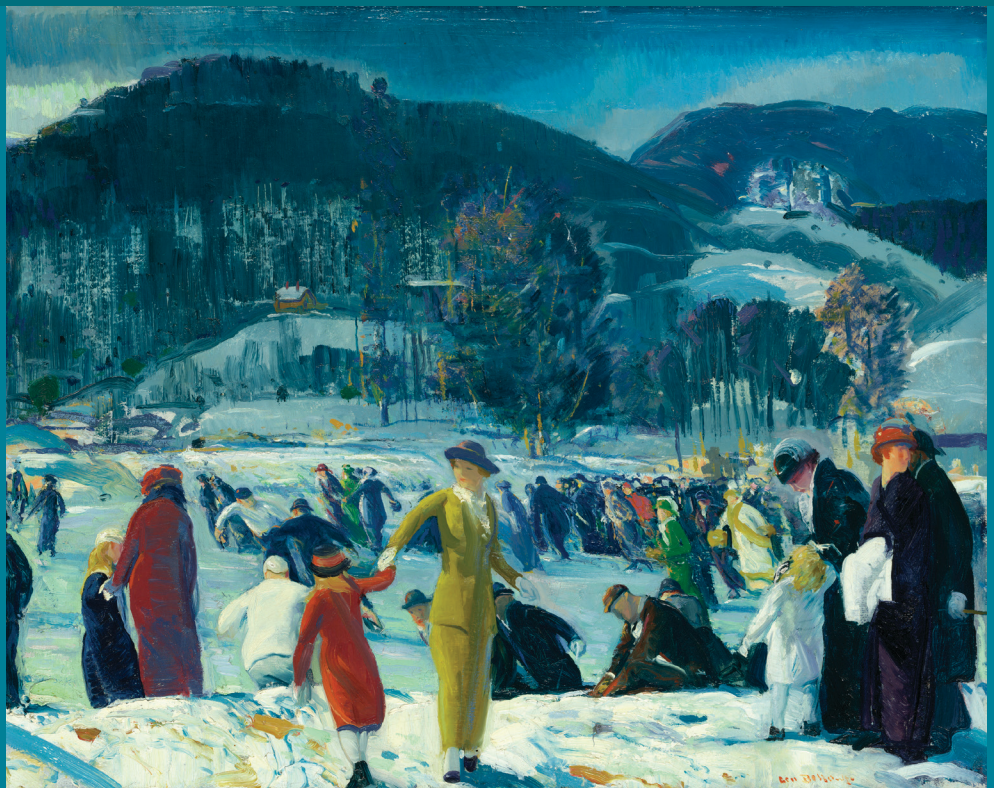

The Humble Leader as facilitator for implementing evidence-based practices  
Improved depression screening with collaborative care training for case managers  
First-episode psychosis: use and costs of health care services  
Technology in Mental Health: inventing the future of services
