# Psychiatric Services

A Journal of the American Psychiatric Association

*Psychiatric Services*, established in 1950, is published monthly by the American Psychiatric Association for mental health professionals and others concerned with treatment and services for persons with mental illnesses and mental disabilities, in keeping with APA's objectives to improve care and treatment, to promote research and professional education in psychiatric and related fields, and to advance the standards of all psychiatric services and facilities.

## Editor

Lisa B. Dixon, M.D., M.P.H.

## Editorial Board

Steven Adelsheim, M.D.  
Regina Bussing, M.D., M.S.H.S.  
Javier I. Escobar, M.D.  
Stephen M. Goldfinger, M.D.  
Marcela Horvitz-Lennon, M.D., M.P.H.  
Sheryl H. Kataoka, M.D.  
Roberto Lewis-Fernández, M.D.  
Ramin Mojtabai, M.D., Ph.D.  
Mark R. Munetz, M.D.  
Martha Sajatovic, M.D.  
Gregory E. Simon, M.D., M.P.H.  
T. Scott Stroup, M.D., M.P.H.

## Editors Emeriti

Howard H. Goldman, M.D., Ph.D.  
John A. Talbott, M.D.

## Contributing Editors

Paul S. Appelbaum, M.D., *Law & Psychiatry*  
Dror Ben-Zeev, Ph.D., *Technology in Mental Health*  
Francine Cournos, M.D., and Stephen M. Goldfinger, M.D., *Frontline Reports*  
Benjamin G. Druss, M.D., M.P.H., and Gail L. Daumit, M.D., M.H.S., *Integrated Care*  
Jeffrey L. Geller, M.D., M.P.H., *Personal Accounts*  
Marcela Horvitz-Lennon, M.D., M.P.H., and Kenneth Minkoff, M.D., *Promoting High-Value Mental Health Care*  
Amy M. Kilbourne, Ph.D., M.P.H., and Tami L. Mark, Ph.D., *Datapoints*  
Fred C. Osher, M.D., and Marvin S. Swartz, M.D., *State Mental Health Policy*  
Kathleen M. Pike, M.D., *Global Mental Health Reforms*  
Debra A. Pinals, M.D., and Marcia Valenstein, M.D., M.S., *Research, Community, & Services Partnerships*  
Jules M. Ranz, M.D., Susan M. Deakins, M.D., and Stephanie Le Melle, M.D., *Case Studies in Public-Sector Leadership*  
Steven S. Sharfstein, M.D., Haiden A. Huskamp, Ph.D., and Alison Evans Cuellar, Ph.D., *Economic Grand Rounds*

## Statistical Consultant

Deborah R. Medoff, Ph.D.

## Editorial Consultants

Joseph M. Cerimele, M.D.  
Julie M. Donohue, Ph.D.  
Robert E. Drake, M.D., Ph.D.  
Laura Van Tosh

## Editorial Staff

Demarie S. Jackson  
*Managing Editor*  
Kathleen Stearman  
*Senior Editor/Writer*  
Wendy Lieberman Taylor  
*Production Manager*  
Heidi A. Koch  
*Editorial Support Services Manager*

## Publisher

Rebecca D. Rinehart

## Editorial Director, Journals

Michael D. Roy

## American Psychiatric Association

Maria A. Oquendo, M.D., Ph.D., *President*  
Anita S. Everett, M.D., *President-Elect*  
Daniel J. Anzia, M.D., *Speaker, APA Assembly*  
Saul Levin, M.D., M.P.A., *Chief Executive Officer and Medical Director*

## Mailing Address

Psychiatric Services  
American Psychiatric Association  
1000 Wilson Blvd., Suite 1825  
Arlington, VA 22209-3901

## Editorial Office

Phone: 703-907-7885  
E-mail: [psjournal@psych.org](mailto:psjournal@psych.org)
