# FIND YOUR CAREER BALANCE IN CALIFORNIA

## PSYCHIATRISTS

**\$244,128 - \$293,340**  
annual salary (Board Certified)

**\$237,864 - \$285,072**  
annual salary (Board Eligible)

California Department of Corrections and Rehabilitation (CDCR) is seeking proactive, knowledgeable psychiatrists with an interest in correctional and/or forensic psychiatry to join our multidisciplinary teams. With CDCR, you will find like-minded professionals well-versed in the intricate psychiatric and medical interplay necessary to treat our diverse patient population. Here, you will see and develop treatment plans for cases you won't encounter in any other practice. And with our strong Positive Behavioral Support Team's assistance, you'll be able to devote your time to practicing and honing advanced psychopharmacological skills.

In return for your efforts, we offer:

- 40-hour workweek with flexible schedules
- Generous paid time off and holiday schedule
- State of California pension that vests in five years
- 401(k) and 457(b) options – tax defer up to \$35,000 per year
- Paid insurance, license, and DEA renewal
- Visa sponsorship opportunities
- Paid CME with paid time off to attend
- \$10,000 Thank You Bonus to professionals newly hired with the State of California

We have opportunities at the following California locations:

California Health Care Facility – Stockton, CA  
California Men's Colony – San Luis Obispo, CA  
California State Prison, Corcoran – Corcoran, CA  
California Substance Abuse Treatment Facility and State Prison – Corcoran, CA  
Kern Valley State Prison – Delano, CA  
Mule Creek State Prison – Ione, CA  
North Kern State Prison – Delano, CA  
Richard J. Donovan Correctional Facility – San Diego, CA

Take the first step in joining this outstanding team and contact LaTrece Phillips at 916-691-4818 or [LaTrece.Phillips@cdcr.ca.gov](mailto:LaTrece.Phillips@cdcr.ca.gov). You may also apply online at [www.ChangingPrisonHealthCare.org](http://www.ChangingPrisonHealthCare.org).

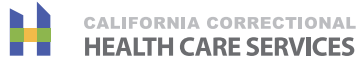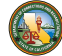

EOE

## UNMATCHED GROWTH OPPORTUNITIES

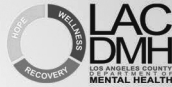

"Working at DMH provides security, stability, great benefits, and flexibility. They also offer a generous salary and opportunity for career advancement at every level. It's a challenging environment, but there's so much support that has really helped with my professional growth."

Anna Xiao, MD  
Psychiatrist

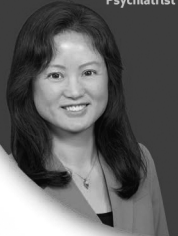

"DMH offers a very good work-life balance, and I'm able to grow professionally without sacrificing my personal life. Another advantage is not being buried in endless paperwork. I'm free to provide the services I think are necessary to my clients."

V. Dorina Trufasu, MD  
Psychiatrist & Internal Medicine

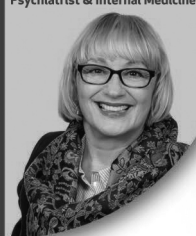

The Los Angeles County Department of Mental Health has immediate openings with Jail Mental Health Services, Juvenile Justice Correctional Facilities, Antelope Valley, and directly operated programs. This is your chance to join the leading mental health agency in the nation and work in a safe, diverse, and challenging environment. Our entire department is filled with opportunities for professional development and growth, and is expanding exponentially with 27 new full-time psychiatrist positions. We offer competitive salaries with potential bonuses up to \$30,000\* a year, depending on qualifications and placement, plus up to 24 hours a week is allowed for outside employment.

\*Based on CEO approval at step 15 of the mental health psychiatrist salary schedule.

[www.psychiatristjobs.la](http://www.psychiatristjobs.la)

**Psychiatric Services** (ISSN |1075-2730; online version, 1557-9700) is published monthly by the American Psychiatric Association, editorial and executive office, 1000 Wilson Blvd., Suite 1825, Arlington, VA 22209-3901. Copyright © 2016 by the American Psychiatric Association. Printed in U.S.A. Periodicals postage paid at Arlington, VA, and at additional mailing offices. **POSTMASTER: Send address changes to *Psychiatric Services*, 1000 Wilson Blvd., Suite 1825, Arlington, VA 22209-3901.**
